# Supplementary material for: Polyarylene polyimides with hydrocarbon and semi-fluorinated backbones: synthesis, characterization, and properties
Source: Royal Society of Chemistry journal article supplement (doi:10.1039/d0py00814a), 2020-01-01
Supplement: d0py00814a1.pdf [file d0py00814a1.pdf]

# Polyarylene polyimides with hydrocarbon and semi-fluorinated backbones: Synthesis, characterization, and properties

*Stephen M. Budy, Jamie Dore Hall, and David Y. Son\**

Southern Methodist University, Department of Chemistry, Dallas, TX 75275 USA

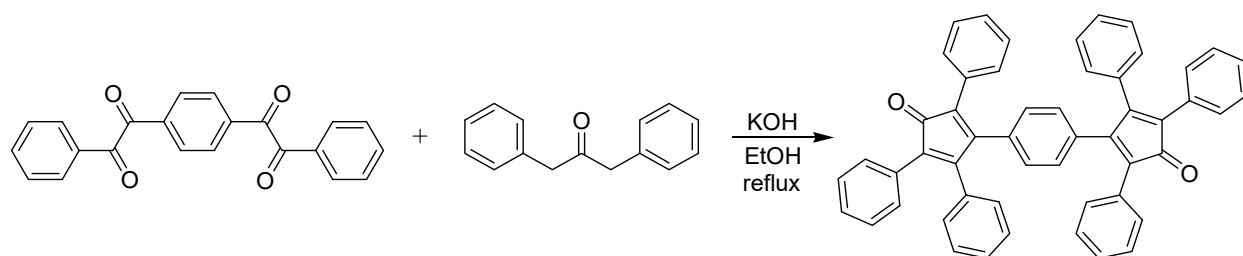

**Scheme S1.** 1,4-Bisbenzil and 1,3-diphenylacetone react under basic conditions to afford bistetracyclone.<sup>1</sup>

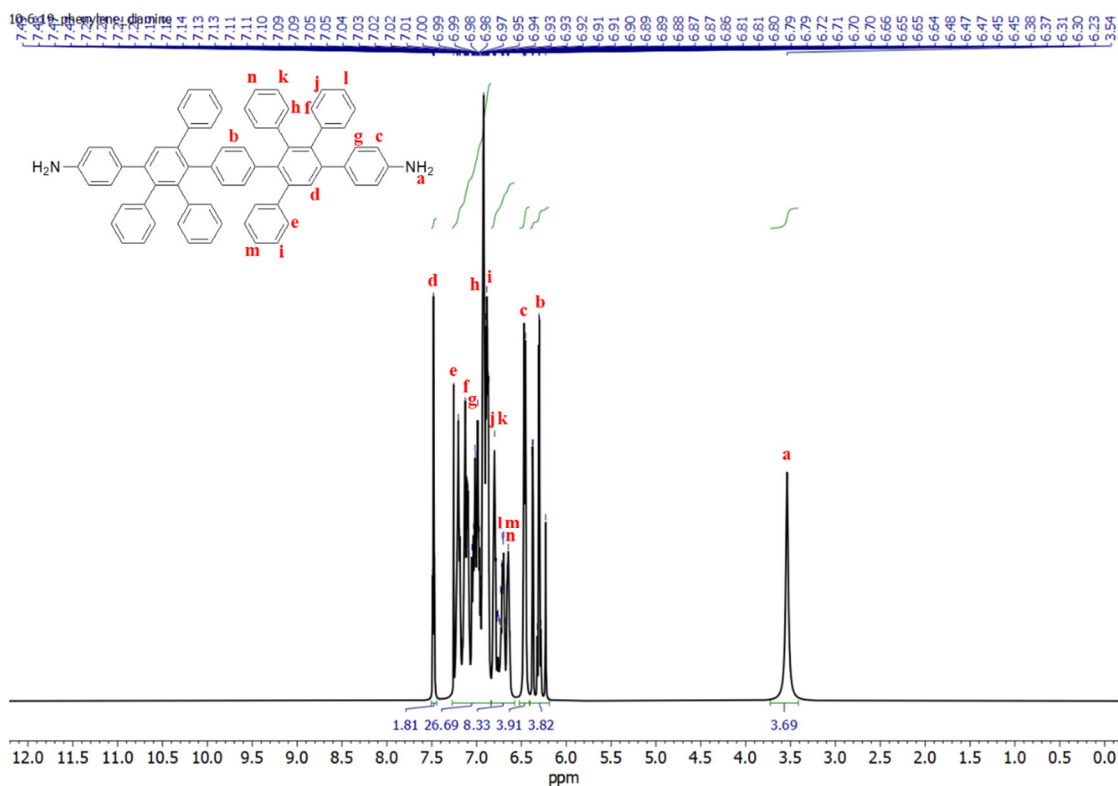

**Figure S1.** <sup>1</sup>H NMR (500 MHz, CDCl<sub>3</sub>) spectrum of phenylated phenylenediamine.

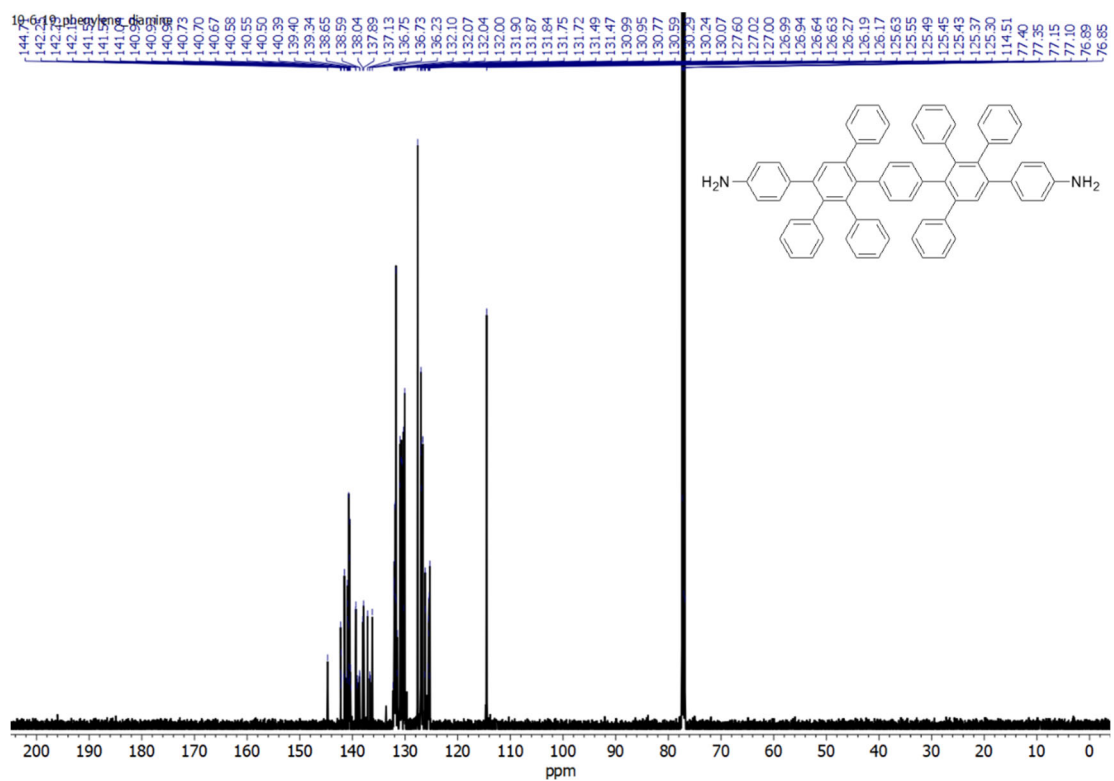

**Figure S2.** <sup>13</sup>C NMR (125 MHz, CDCl<sub>3</sub>) spectrum of phenylated phenylenediamine.

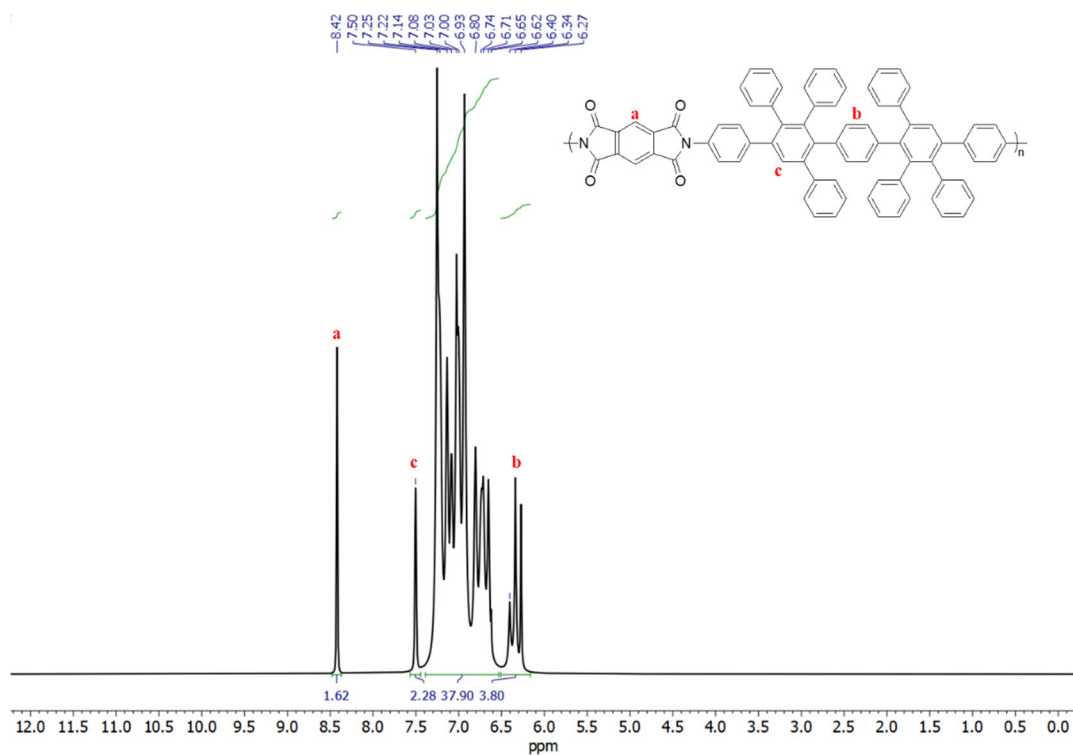

**Figure S3.** <sup>1</sup>H NMR (500 MHz, CDCl<sub>3</sub>) spectrum of PAPI 1.

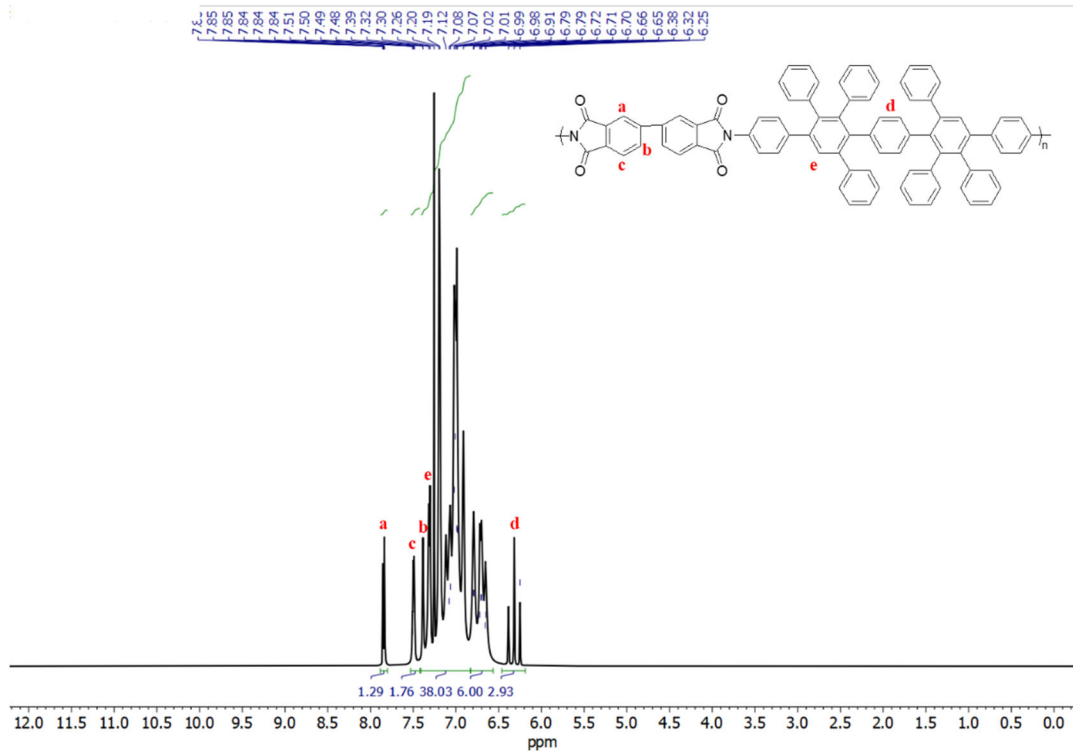

**Figure S4.** <sup>1</sup>H NMR (500 MHz, CDCl<sub>3</sub>) spectrum of PAPI 2

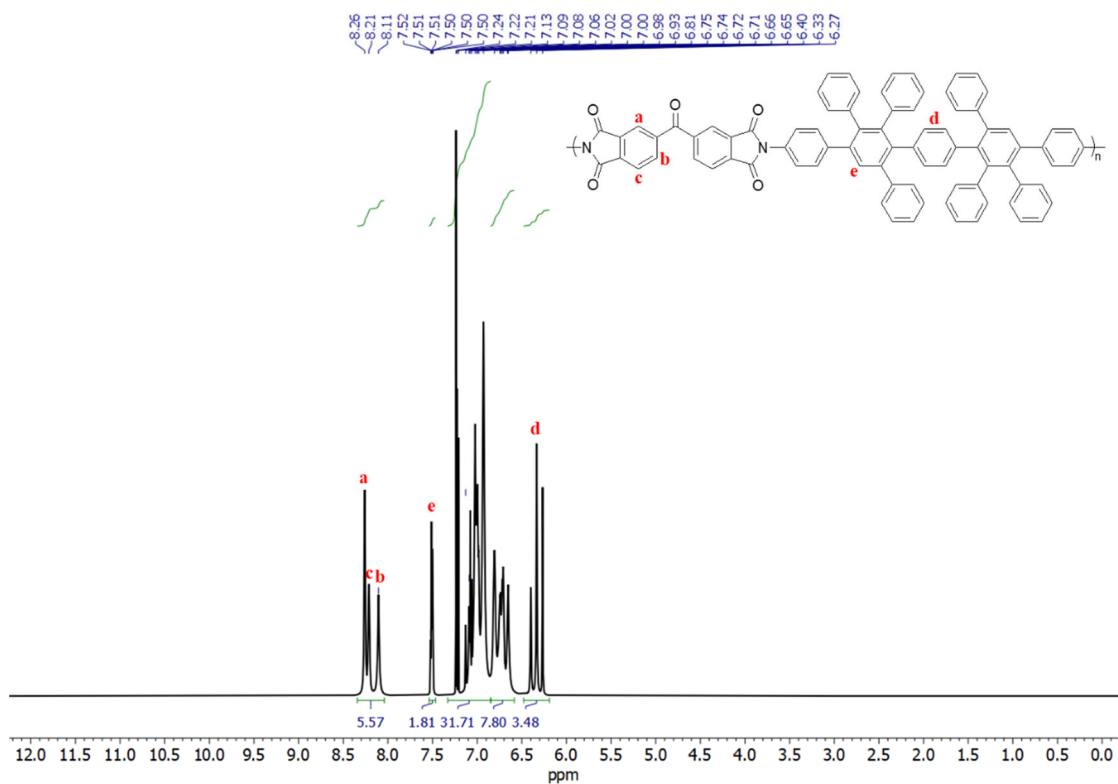

**Figure S5.**  $^1\text{H}$  NMR (500 MHz,  $\text{CDCl}_3$ ) spectrum of PAPI 3.

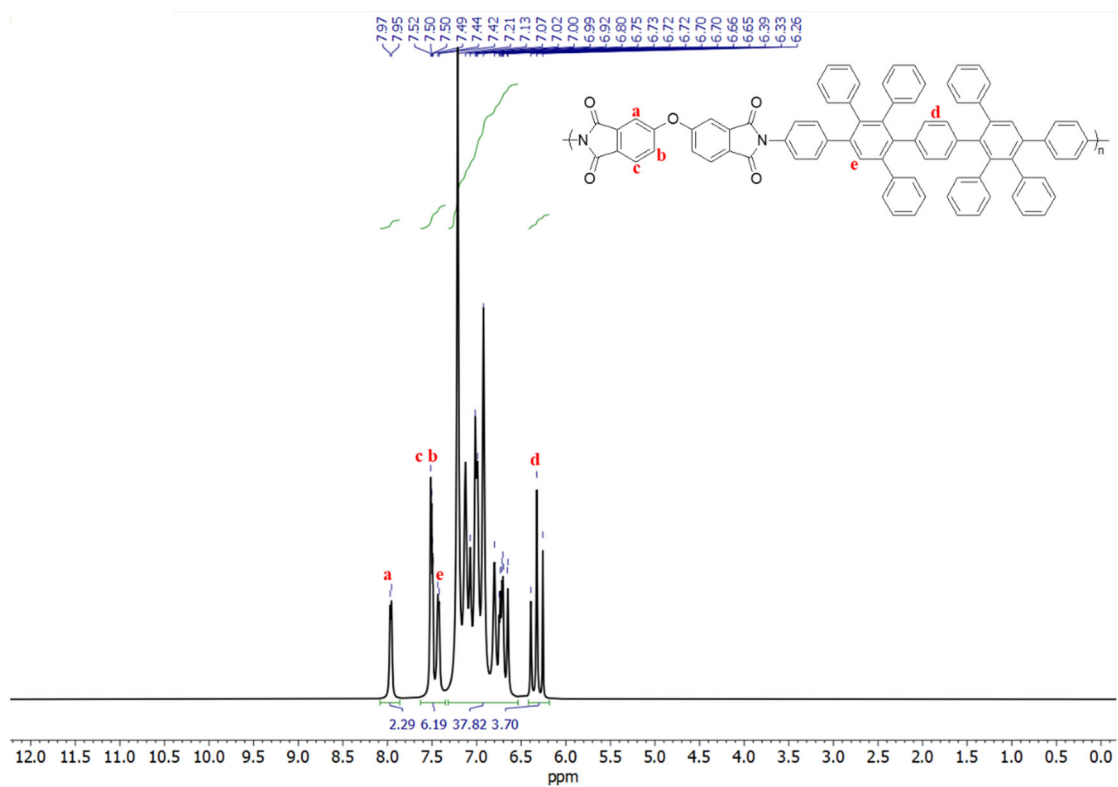

**Figure S6.**  $^1\text{H}$  NMR (500 MHz,  $\text{CDCl}_3$ ) spectrum of PAPI 4.

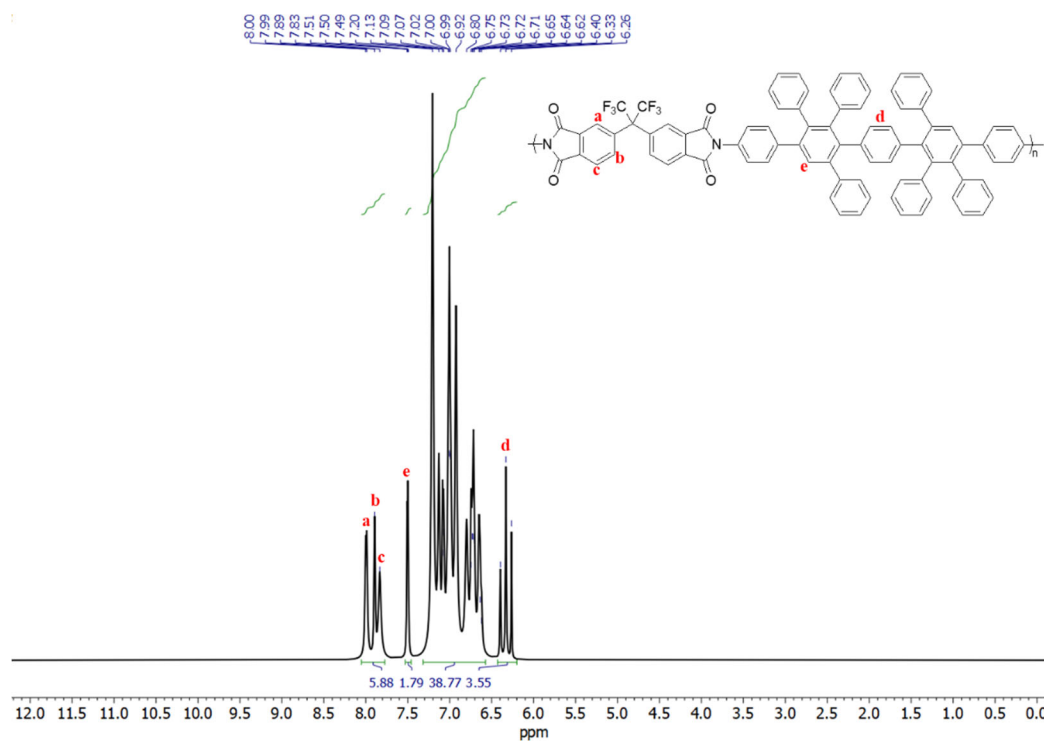

**Figure S7.**  $^1\text{H}$  NMR (500 MHz,  $\text{CDCl}_3$ ) spectrum of PAPI 5.

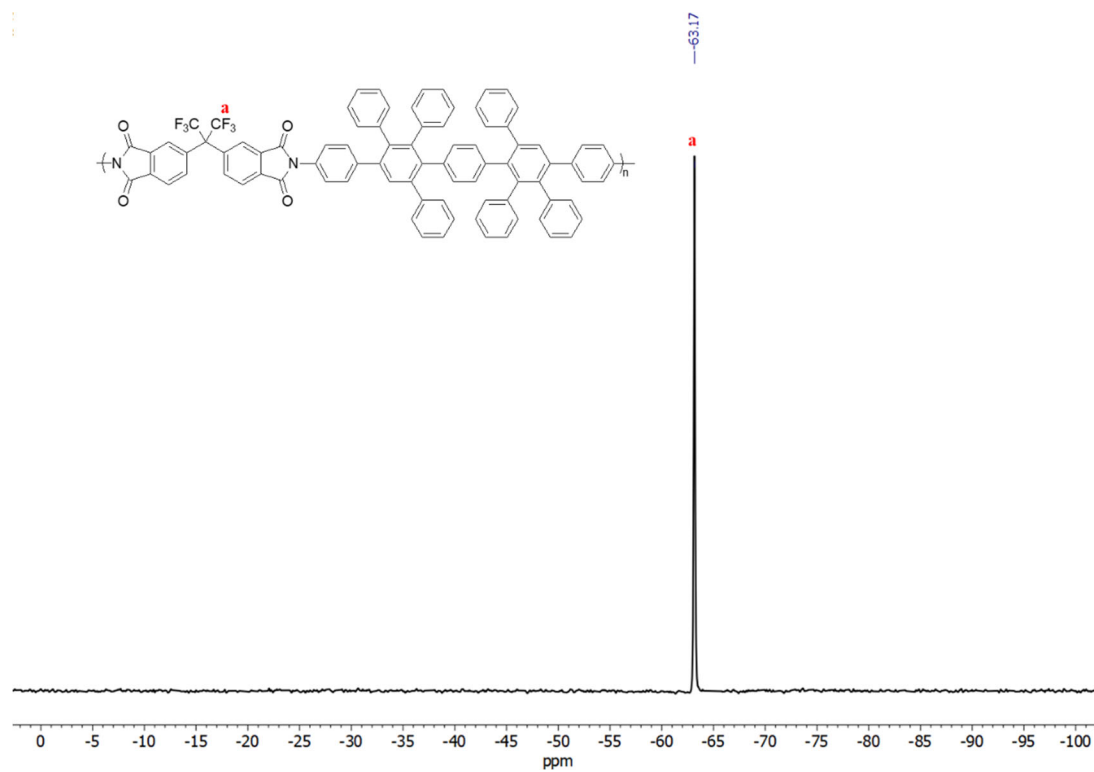

**Figure S8.**  $^{19}\text{F}$  NMR (470 MHz,  $\text{CDCl}_3$ ) spectrum of PAPI 5.

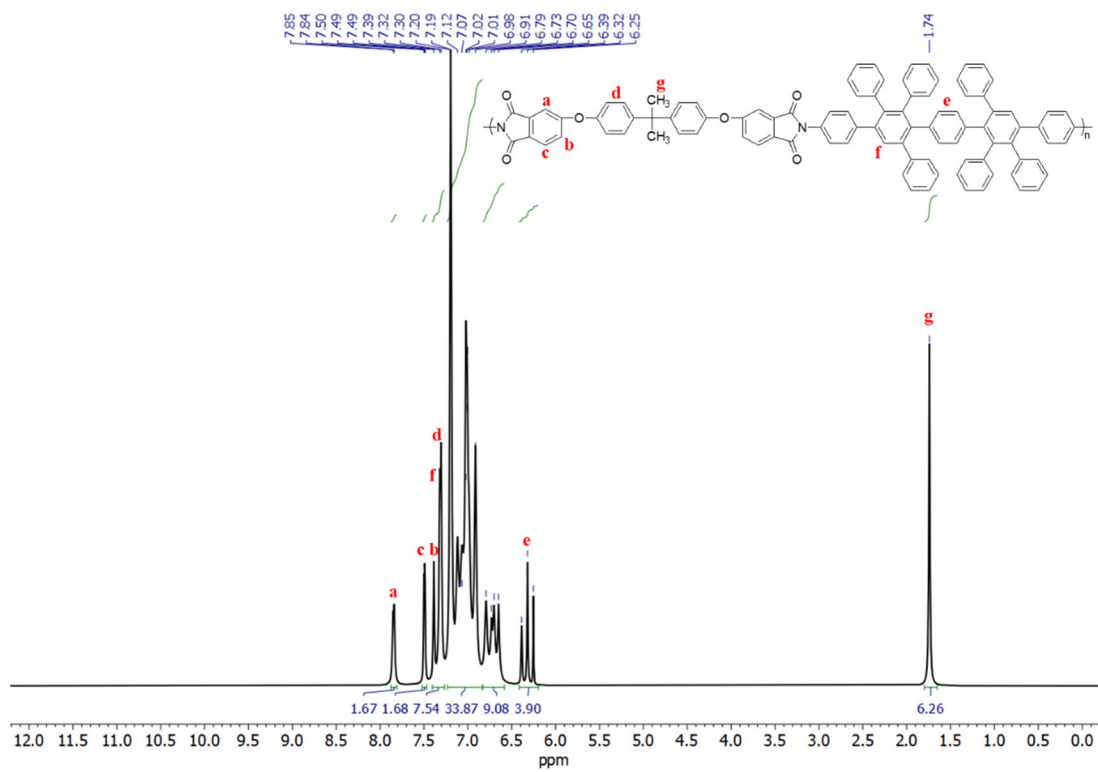

**Figure S9.**  $^1\text{H}$  NMR (500 MHz,  $\text{CDCl}_3$ ) spectrum of PAPI 6.

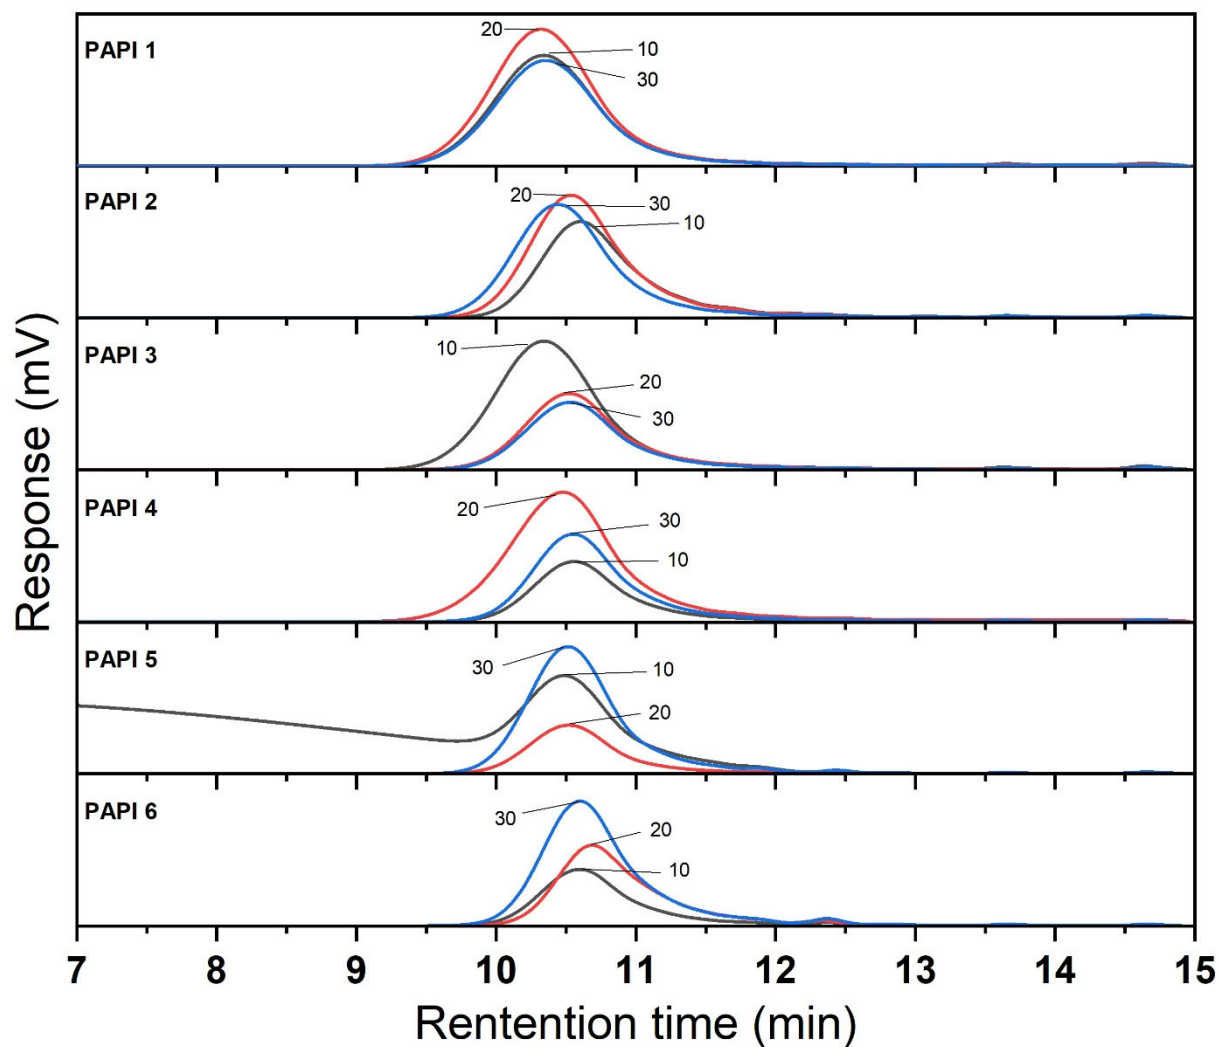

**Figure S10.** Gel permeation chromatography (GPC) results for PAPI 1-6 at 10, 20, and 30 min; 4 columns at 40 °C, HPLC-grade THF at a flow rate = 0.35 mL/min, polymer sample concentration = 1 mg/mL filtered through 0.2- $\mu$ m PTFE syringe filter, refractive index detector, and calibration based on linear polystyrene standards.

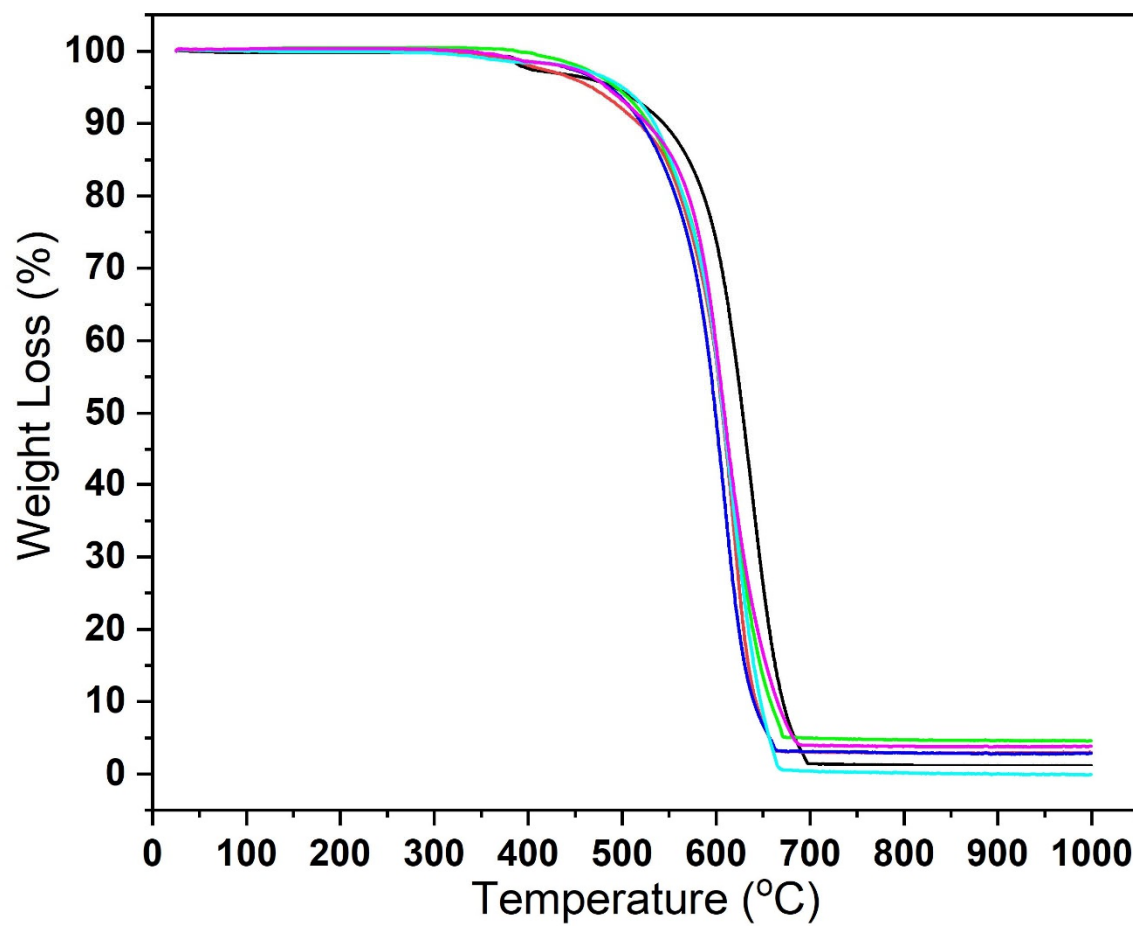

**Figure S11.** Thermal gravimetric analysis (TGA) results of PAPI 1-6 using a heating rate of 10 °C/min and under an atmosphere of air.

## REFERENCES

1. Skalski, T. J. G.; Britton, B.; Peckham, T. J.; Holdcroft, S., Structurally-Defined, Sulfo-Phenylated, Oligophenylenes and Polyphenylenes. *J. Am. Chem. Soc.* **2015**, *137* (38), 12223-12226.
